# Supplementary material for: Concentration-dependent apparent partition coefficients of ionic liquids possessing ethyl- and bi-sulphate anions
Source: Royal Society of Chemistry journal article supplement (doi:10.1039/c5cp06611e), 2015-11-25

**Electronic Supplementary Information (ESI)**

**Concentration-dependent Apparent Partition Coefficients of Ionic  
Liquids Possessing Ethyl- and Bi-sulphate Anions**

Preeti Jain, Anil Kumar\*

Physical and Materials Chemistry Division

CSIR-National Chemical Laboratory

Pune-411 008, India

a.kumar@ncl.res.in

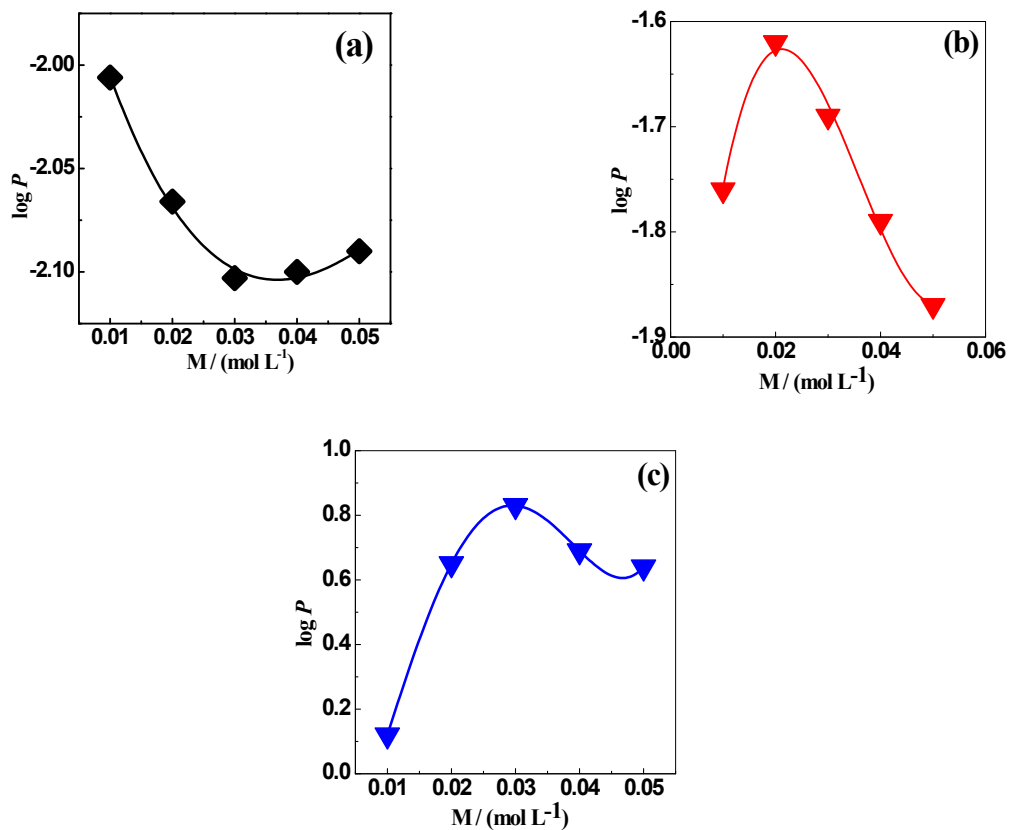

Fig. S1 Variation of  $\log P$  with concentration (a) for [BMIM][HSO<sub>4</sub>], (b) for [HMIM][EtSO<sub>4</sub>], and (c) for [OMIM][EtSO<sub>4</sub>].

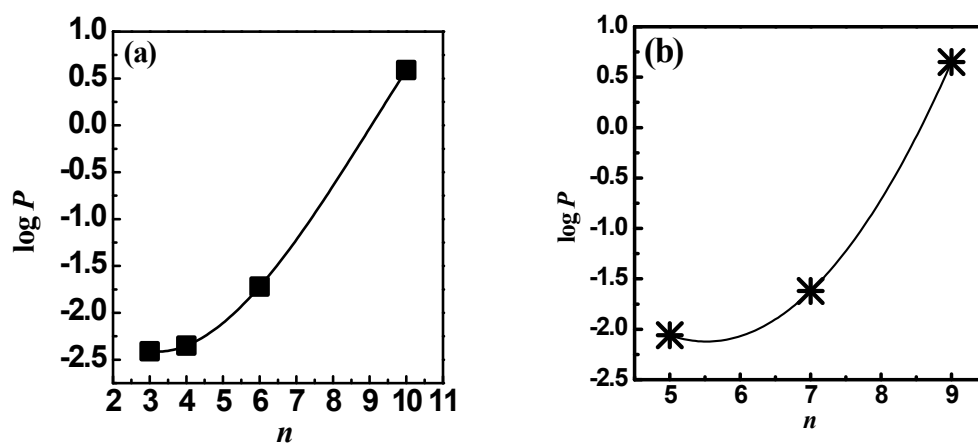

Fig. S2 Variation of  $\log P$  with the number of carbon atoms in alkyl groups attached to the cationic ring of ionic liquids (a) [EtSO<sub>4</sub>]-based ionic liquids, and (b) [HSO<sub>4</sub>]-based ionic liquids.

Table S1. Apparent Partition Coefficient ( $\log P$ ) Values of [EtSO<sub>4</sub>]<sup>-</sup>-based Ionic Liquids as a Function of Concentration at 298 K.

| Conc (M)/<br>(mol L <sup>-1</sup> ) | Log <i>P</i>                   |                                |                                |                                |
|-------------------------------------|--------------------------------|--------------------------------|--------------------------------|--------------------------------|
|                                     | [EMIM]<br>[EtSO <sub>4</sub> ] | [dEIM]<br>[EtSO <sub>4</sub> ] | [EBIM]<br>[EtSO <sub>4</sub> ] | [EOIM]<br>[EtSO <sub>4</sub> ] |
| 0.01                                | -2.04 ± 0.13                   | -2.12 ± 0.08                   | -1.64 ± 0.02                   | 0.19 ± 0.02                    |
| 0.02                                | -2.41 ± 0.02                   | -2.35 ± 0.05                   | -1.72 ± 0.02                   | 0.59 ± 0.05                    |
| 0.03                                | -2.55 ± 0.05                   | -2.45 ± 0.03                   | -1.76 ± 0.00                   | 0.95 ± 0.07                    |
| 0.04                                | -2.62 ± 0.06                   | -2.51 ± 0.02                   | -1.84 ± 0.00                   | 1.32 ± 0.03                    |
| 0.05                                | -2.82 ± 0.03                   | -2.63 ± 0.03                   | -1.92 ± 0.00                   | 1.65 ± 0.01                    |

Table S2. Apparent Partition Coefficient ( $\log P$ ) Values of [HSO<sub>4</sub>]<sup>-</sup>-based Ionic Liquids as a Function of Concentration at 298 K.

| Conc (M) /<br>(mol L <sup>-1</sup> ) | Log <i>P</i>              |                           |                           |
|--------------------------------------|---------------------------|---------------------------|---------------------------|
|                                      | [Bmim][HSO <sub>4</sub> ] | [HMIM][HSO <sub>4</sub> ] | [OMIM][HSO <sub>4</sub> ] |
| 0.01                                 | -2.01 ± 0.02              | -1.76 ± 0.02              | 0.12 ± 0.02               |
| 0.02                                 | -2.07 ± 0.03              | -1.62 ± 0.02              | 0.66 ± 0.02               |
| 0.03                                 | -2.11 ± 0.02              | -1.69 ± 0.02              | 0.83 ± 0.04               |
| 0.04                                 | -2.10 ± 0.00              | -1.79 ± 0.01              | 0.69 ± 0.01               |
| 0.05                                 | -2.09 ± 0.00              | -1.87 ± 0.02              | 0.64 ± 0.02               |

Table S3. Apparent Partition Coefficient ( $\log P$ ) Values of Pyridinium-based Ionic Liquids as a Function of Concentration at 298 K.

| Conc (M) /<br>(mol L <sup>-1</sup> ) | Log P        |              |
|--------------------------------------|--------------|--------------|
|                                      | [BPy][HSO4]  | [OPy][HSO4]  |
| 0.01                                 | -2.45 ± 0.02 | -0.39 ± 0.02 |
| 0.02                                 | -2.63 ± 0.01 | 0.20 ± 0.01  |
| 0.03                                 | -2.51 ± 0.01 | 0.40 ± 0.07  |
| 0.04                                 | -2.44 ± 0.00 | 0.86 ± 0.03  |
| 0.05                                 | -2.42 ± 0.00 | 1.22 ± 0.09  |

Table S4. Log  $P$  of Ionic Liquids having different Anion and Cationic Ring as a Function of Concentration at 298 K.

| Conc (M)/<br>(mol L <sup>-1</sup> ) | Log P            |                   |                  |                 |
|-------------------------------------|------------------|-------------------|------------------|-----------------|
|                                     | [Bmim]<br>[HSO4] | [BMIM]<br>[BuSO4] | [OMIM]<br>[HSO4] | [OPy]<br>[HSO4] |
| 0.01                                | -2.01 ± 0.02     | -0.59 ± 0.04      | 0.12 ± 0.02      | -0.39 ± 0.02    |
| 0.02                                | -2.07 ± 0.03     | -0.69 ± 0.05      | 0.66 ± 0.02      | 0.20 ± 0.01     |
| 0.03                                | -2.11 ± 0.02     | -0.76 ± 0.03      | 0.83 ± 0.04      | 0.40 ± 0.07     |
| 0.04                                | -2.10 ± 0.00     | -0.70 ± 0.03      | 0.69 ± 0.01      | 0.86 ± 0.03     |
| 0.05                                | -2.09 ± 0.00     | -0.67 ± 0.02      | 0.64 ± 0.02      | 1.22 ± 0.09     |

Table S5. Molar Absorption Coefficient Values of Ionic Liquids in Saturated *n*-Octanol and Saturated Water.

| Name of ILs                | $\epsilon$ in saturated <i>n</i> -octanol<br>(mol <sup>-1</sup> L cm <sup>-1</sup> ) | $\epsilon$ in saturated water (mol <sup>-1</sup> L<br>cm <sup>-1</sup> ) |
|----------------------------|--------------------------------------------------------------------------------------|--------------------------------------------------------------------------|
| [EMIM][EtSO <sub>4</sub> ] | 1570.00 ± 27.84                                                                      | 4115.4 ± 72.119                                                          |
| [dEIM][EtSO <sub>4</sub> ] | 2767.08 ± 139.46                                                                     | 4132.90 ± 113.92                                                         |
| [EBIM][EtSO <sub>4</sub> ] | 3955.08 ± 78.01                                                                      | 4227.08 ± 156.87                                                         |
| [EOIM][EtSO <sub>4</sub> ] | 3801.25 ± 74.19                                                                      | 3973.34 ± 91.18                                                          |
| [BMIM][HSO <sub>4</sub> ]  | 3096.67 ± 124.98                                                                     | -                                                                        |
| [HMIM][HSO <sub>4</sub> ]  | 4074.15 ± 212.87                                                                     | -                                                                        |
| [OMIM][HSO <sub>4</sub> ]  | 4704.15 ± 299.31                                                                     | -                                                                        |
| [BMIM][BuSO <sub>4</sub> ] | 4280.42 ± 100.65                                                                     | 4151.25 ± 52.82                                                          |
| [BPy][HSO <sub>4</sub> ]   | 4995.00 ± 155.38                                                                     | 4934.16 ± 225.02                                                         |
| [OPy][HSO <sub>4</sub> ]   | 3455.00 ± 196.50                                                                     | 3287.08 ± 99.45                                                          |

# 1. [EMIM][EtSO<sub>4</sub>] - <sup>1</sup>H NMR, 200 MHz, CDCl<sub>3</sub>

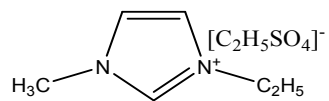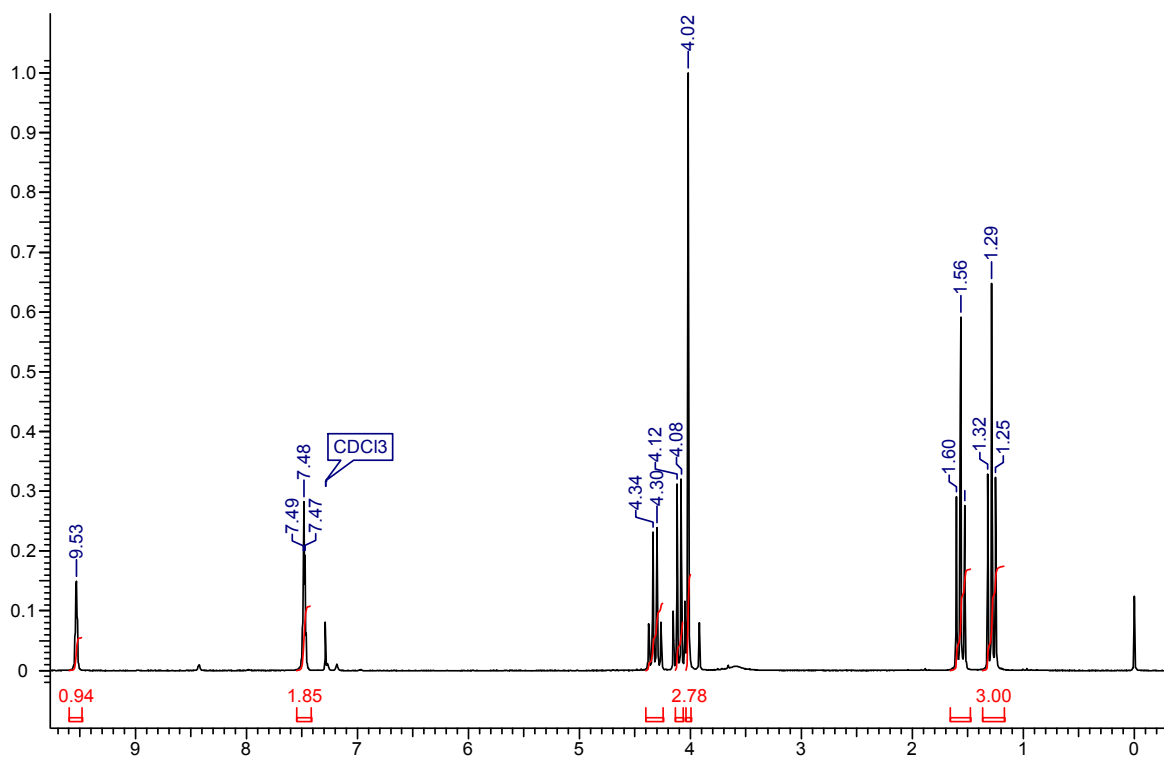

2. [dEIM][EtSO<sub>4</sub>] - <sup>1</sup>H NMR, 200 MHz, CDCl<sub>3</sub>

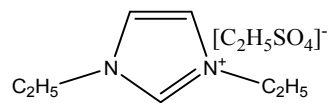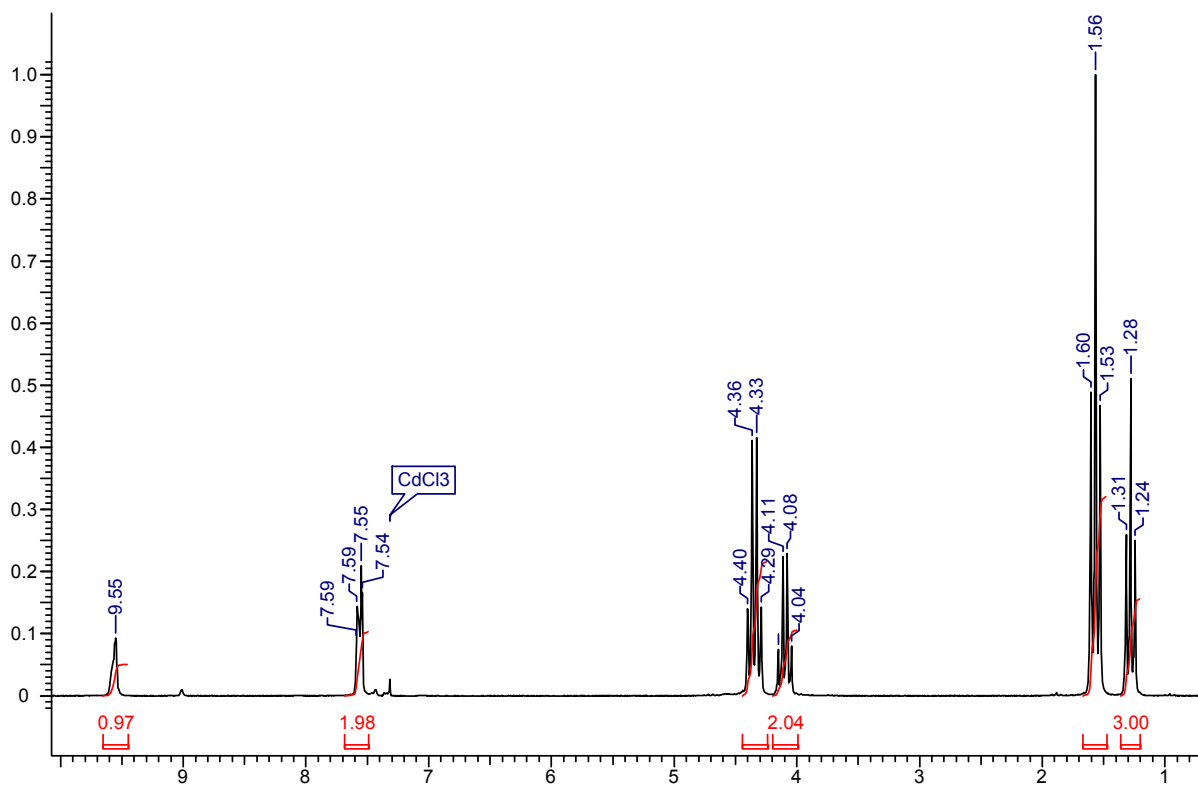

### 3. [EBIM][EtSO<sub>4</sub>] - <sup>1</sup>H NMR, 200 MHz, CDCl<sub>3</sub>

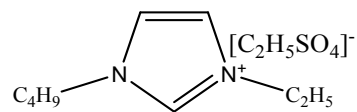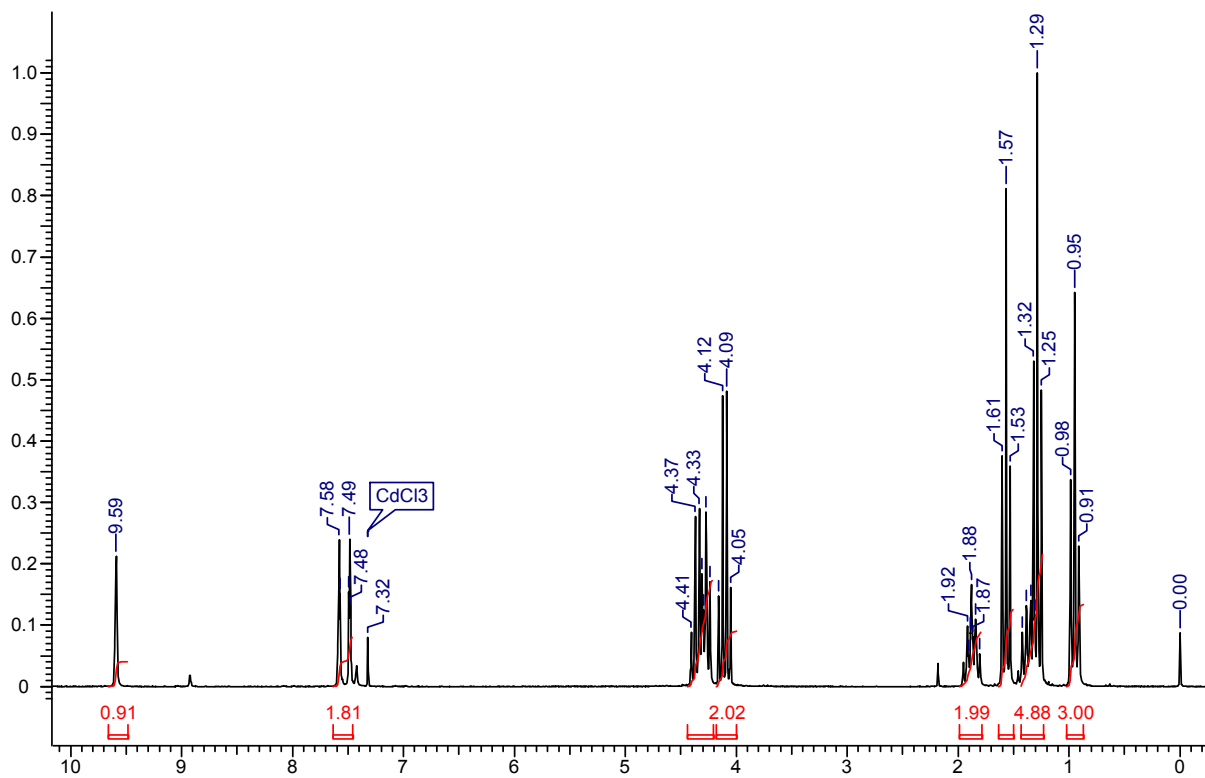



#### 4. [EOIM][EtSO<sub>4</sub>] - <sup>1</sup>H NMR, 200 MHz, CDCl<sub>3</sub>

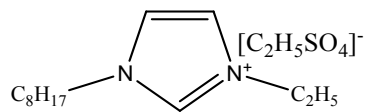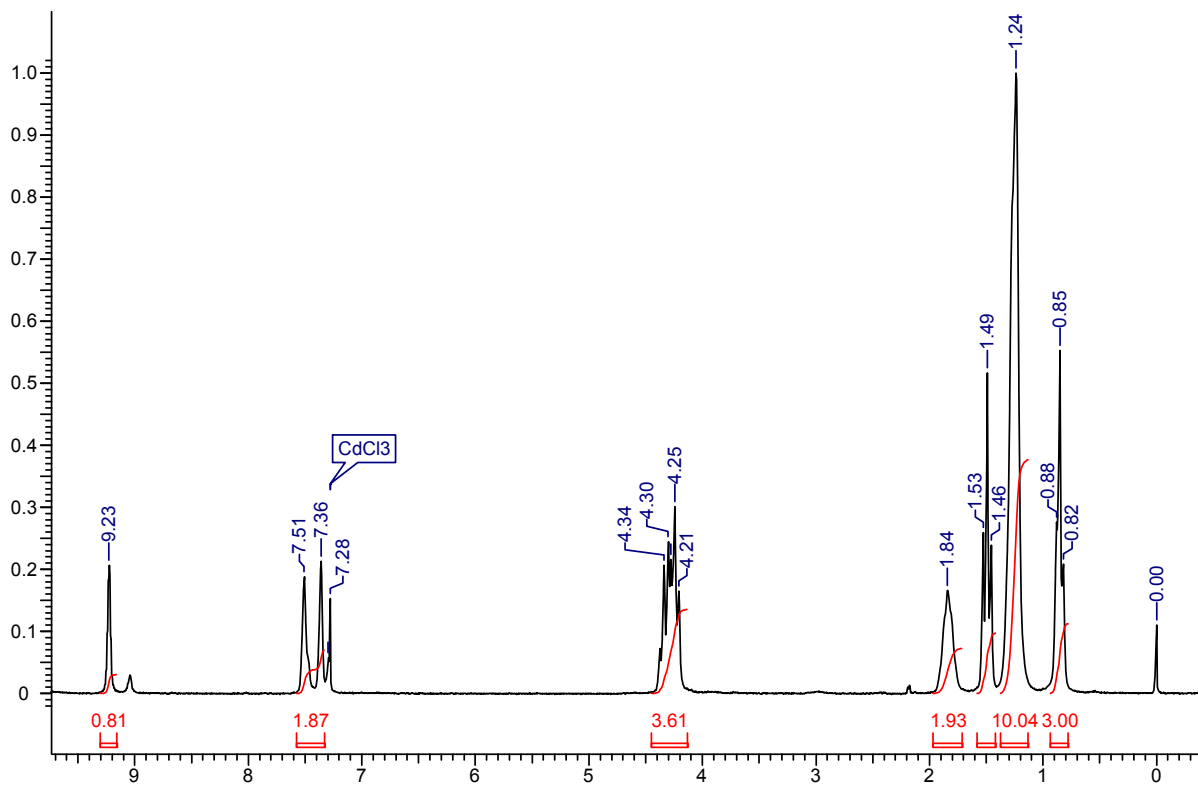

5. [BMIM][HSO<sub>4</sub>] - <sup>1</sup>H NMR, 200 MHz, CDCl<sub>3</sub> +DMSO-d<sub>6</sub>

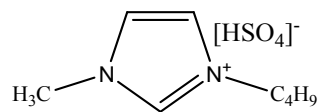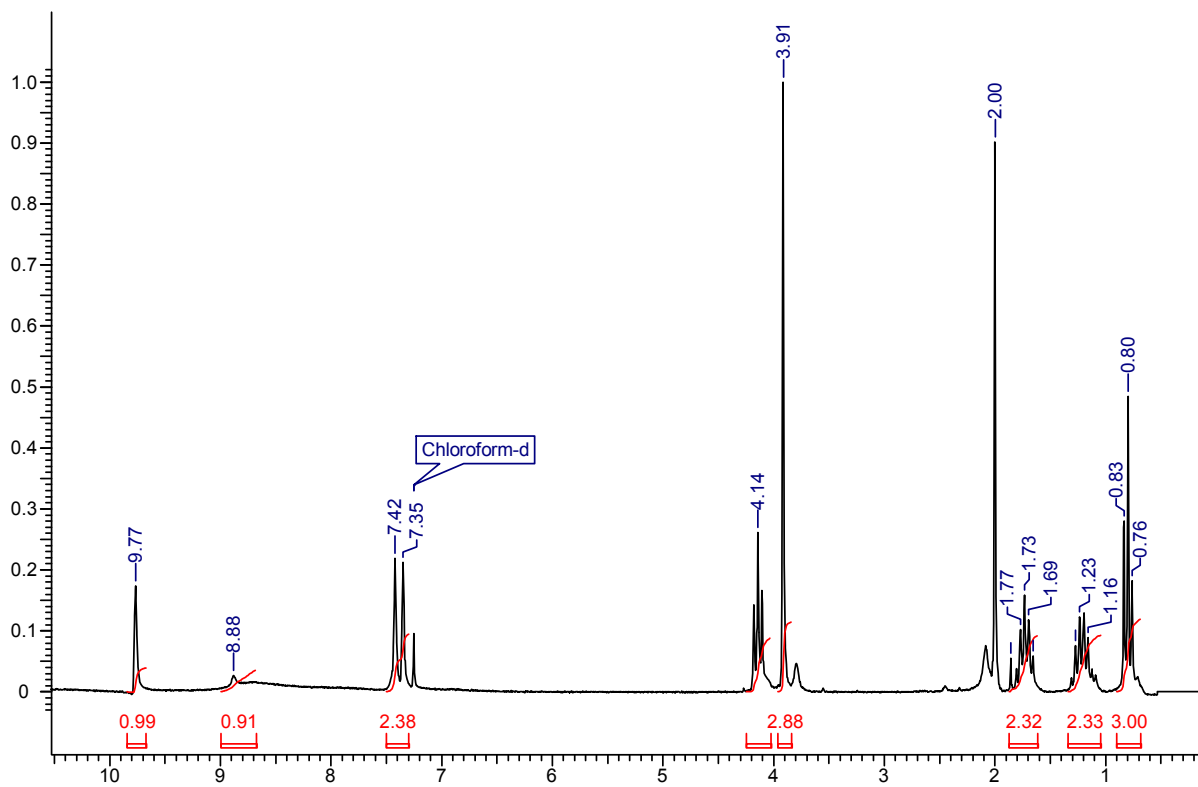

6. [HMIM][HSO<sub>4</sub>] - <sup>1</sup>H NMR, 200 MHz, CDCl<sub>3</sub> +DMSO-d<sub>6</sub>

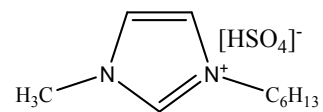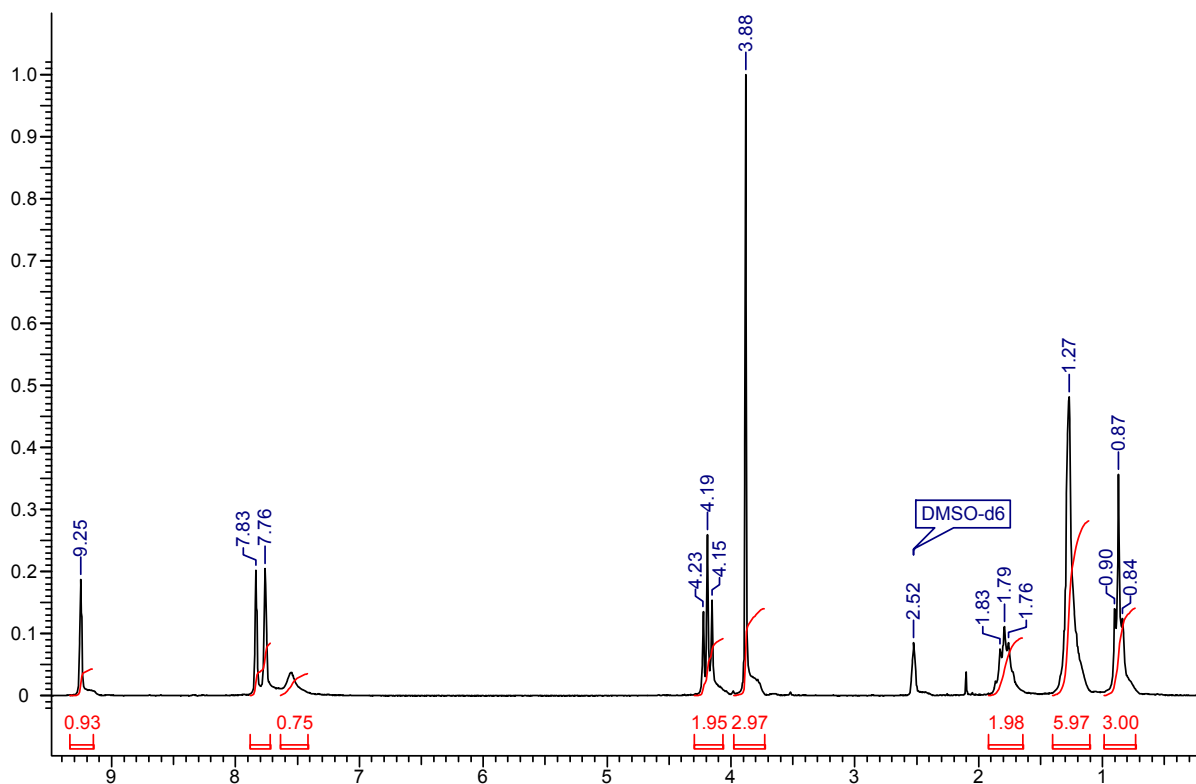

### 7. [OMIM][HSO<sub>4</sub>] - <sup>1</sup>H NMR, 200 MHz, CDCl<sub>3</sub>

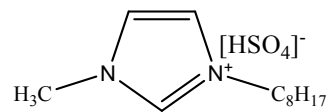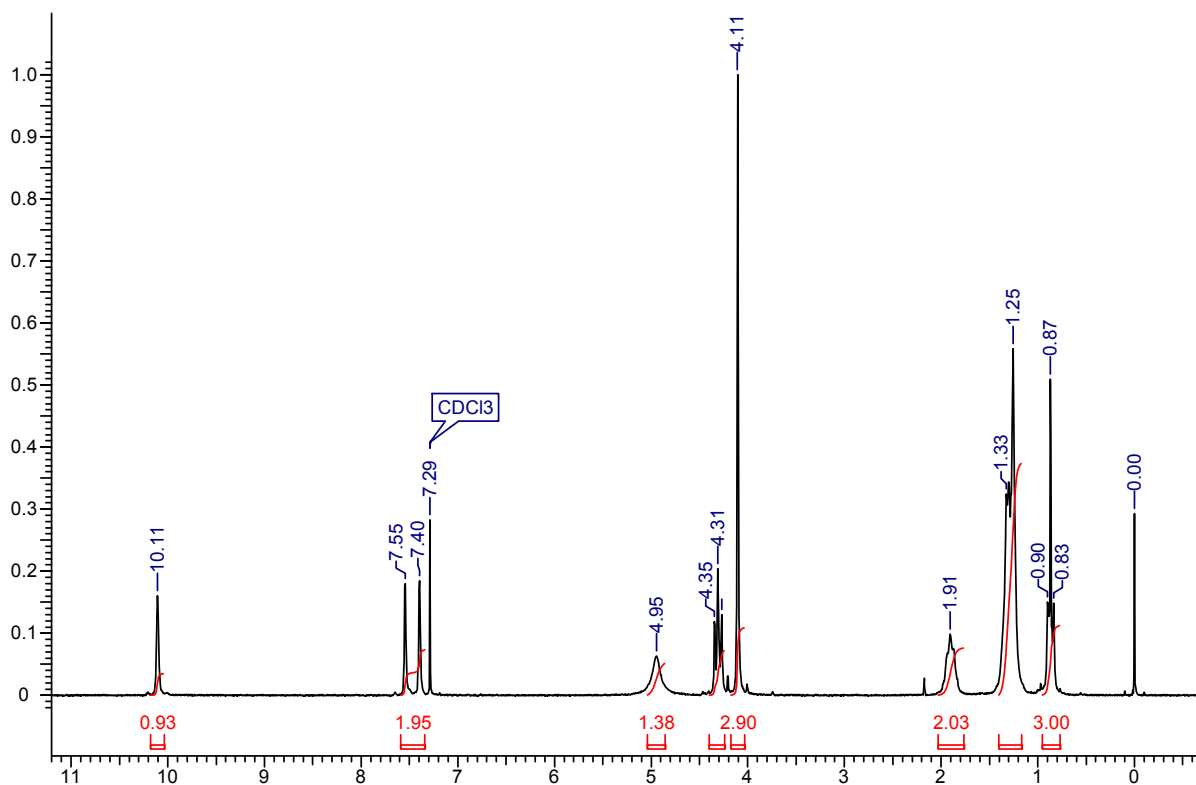

8. [BPy][HSO<sub>4</sub>] - <sup>1</sup>H NMR, 200 MHz, CDCl<sub>3</sub> +DMSO-d<sub>6</sub>

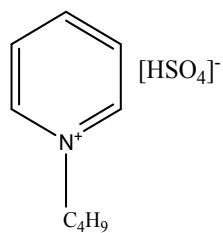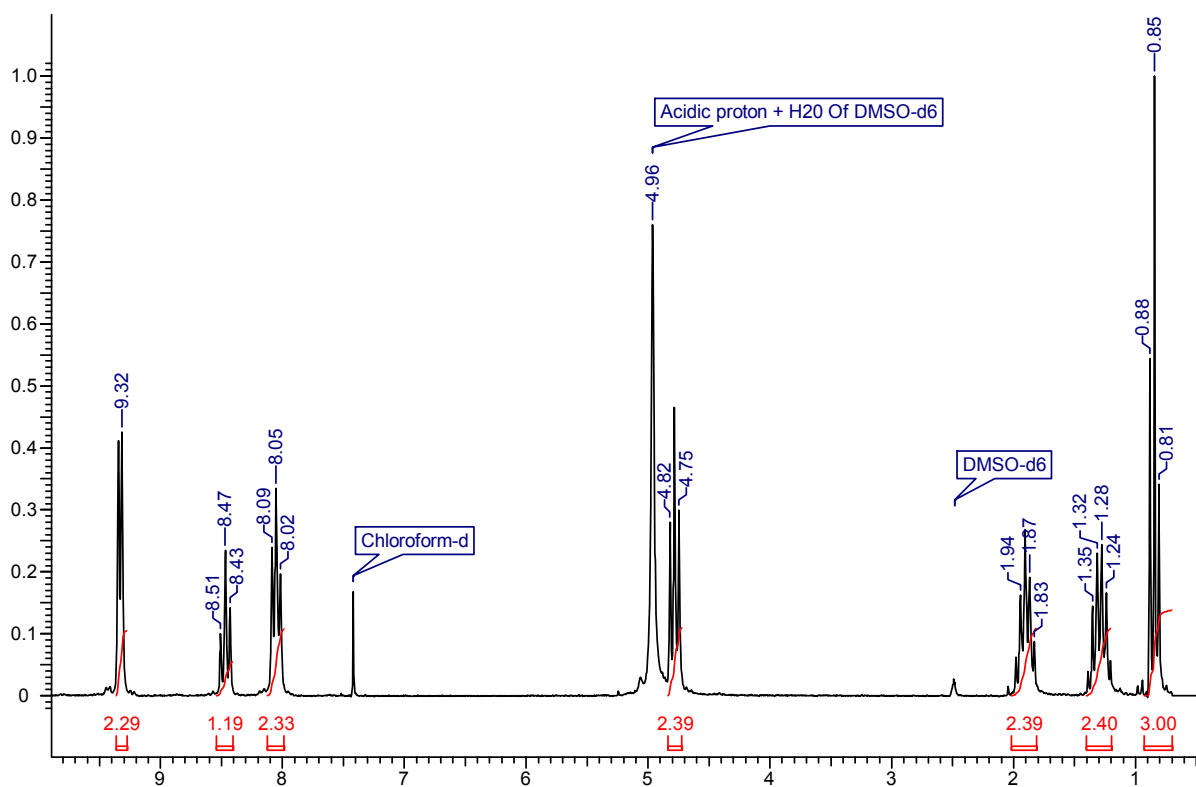

### 9. [OPy][HSO<sub>4</sub>] - <sup>1</sup>H NMR, 200 MHz, CDCl<sub>3</sub>

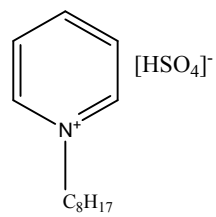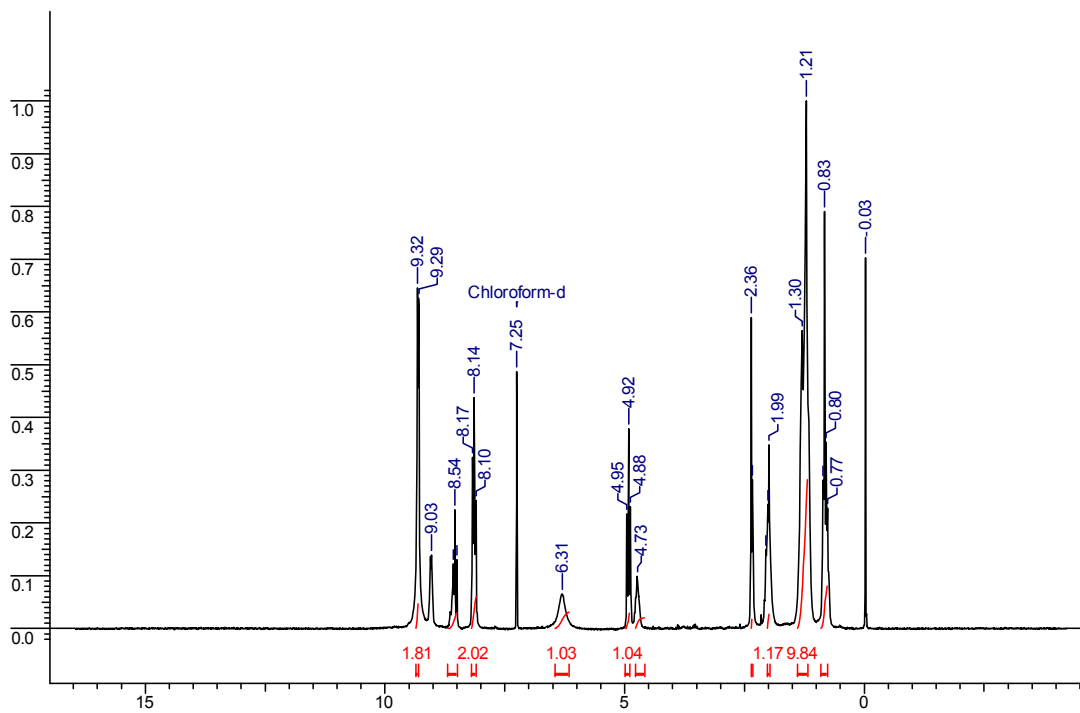

10. [BMIM][BuSO<sub>4</sub>] - <sup>1</sup>H NMR, 200 MHz, CDCl<sub>3</sub> + DMSO-d<sub>6</sub>

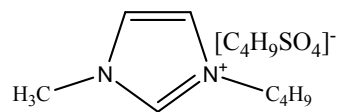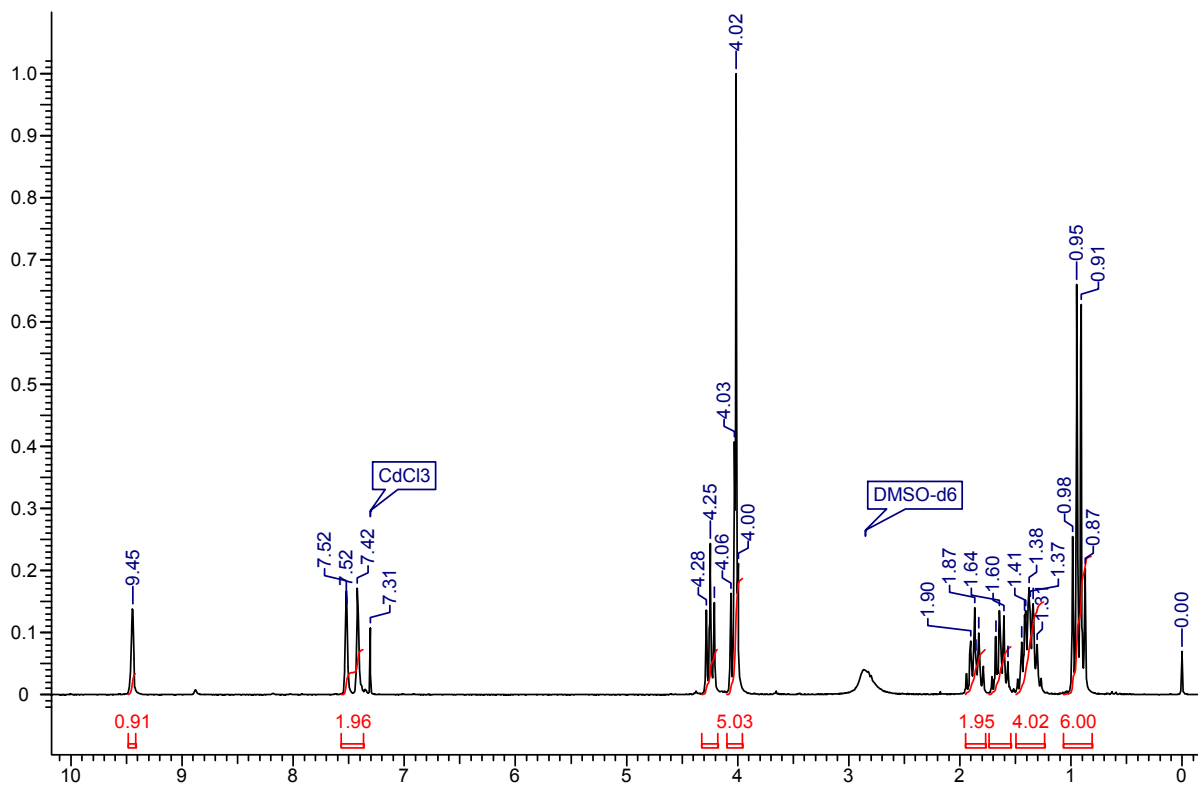

Supplement: c5cp06611e1.pdf [file c5cp06611e1.pdf]
